# Supplementary material for: Supramolecular assemblies formed by new l-lysine derivatives of viologens
Source: Royal Society of Chemistry journal article supplement (doi:10.1039/b106513k), 2001-01-01

# Supplementary data

**Supramolecular Assemblies formed by New L-Lysine Derivatives of Viologens**

Masahiro Suzukia*, Chad C. Waraksab, Hiroko Nakayamac, Kenji Hanabusaa, Mutsumi Kimurac and Hirofusa Shiraic.

*aGraduate School of Science and Technology, Shinshu University, Ueda, Nagano 386-8567, JAPAN*

*bDepartment of Chemistry, The Pennsylvania State University, University Park, PA 16802*

# *cDepartment of Functional Polymer Science, Faculty of Textile Science and Technology, Shinshu University, Ueda, Nagano 386-8567, JAPAN.*

Experimental

**Materials**

N--Lauroyl-L-lysine was supplied from Ajinomoto Co., Inc. All starting materials were purchased from chemical suppliers and used without further purification. 11-Bromoundecanoyl chloride and 6-bromohexanoyl chloride were prepared by refluxing of corresponding acids in thionyl chloride for 12 h.

**Synthesis of N--lauroyl-L-lysine ethyl ester**

An ethanol suspension of N--lauroyl-L-lysine was saturated with a dry hydrogen chloride in an ice-bath. After standing overnight at room temperature, the resulting solution was evaporated. Ethyl ether was added and the HCl salt of N--lauroyl-L-lysine ethyl ester was filtered and washed with ether. The HCl salt was dissolved in water and insoluble material was removed by filteration through celite. A large excess of morpholine was added to the filtrate with stirring. White precipitate was collected by filtration, washed with water, and then dried. The N--lauroyl-L-lysine ethyl ester was purified by recrystallization from n-hexane (96%). IR (KBr) n: 3304 (NH), 1726 (C=O, ester), 1641 cm-1 (C=O, amide). Anal. Calcd. for C20H40N2O3: C, 67.37; H ,11.31; N, 7.86. Found: C, 67.58; H, 12.05; N 8.00.

**Synthesis of N-(6-bromohexanoyl)-N--lauroyl-L-lysine ethyl ester (C2AmiC6Br)**

To a dry THF solution of N--lauroyl-L-lysine ethyl ester containing a dry triethylamine, 6-bromohexanoyl chloride was slowly added at 0 C with stirring. After stirring at room temperature for 24 h, the white precipitate was filtered and washed with THF. The mixture of the filtrate and washings was evaporated to dryness. The white solid of the product was purified by recrystallization from ethanol-ether(94%). Elemental Anal. Calcd. for C26H50N2O4Br: C, 58.4; H, 9.44; N, 5.24. Found: C, 58.64; H, 9.55; N, 5.26.

**Synthesis of 1,1’-bis[N-(6-hexanoyl)-N--lauroyl-L-lysine ethyl ester]-4,4’-bipyridinium bromide (Viologen 1)**

C2AmiC6Br and 4,4’-bipyridine in a molar ratio of 3 : 1 in DMF was heated at 100 C for 48 h. After cooling to room temperature, the yellow precipitate was filtered and washed with DMF and ether(93%). The pure [C2AmiC6]2Viologen was obtained by recrystallization from methanol-ether. Elemental Anal. Calcd. for C62H108N6O8Br: C, 60.76; H, 8.9; N, 6.85. Found: C, 61.11; H, 9.02; N, 6.91.

**Synthesis of N--(11-bromoundecanoyl)-N--lauroyl-L-lysine ethyl ester (C2AmiC11Br)**

The product was prepared by the same procedure as C2AmiC6Br(91%). Elemental Anal. Calcd. for C31H59N2O4Br: C, 61.66; H, 9.87; N, 4.64. Found: C, 61.89; H, 9.95; N, 4.66.

**Synthesis of 1,1’-bis[N--(11-undecanoyl)-N--lauroyl-L-lysine ethyl ester]-4,4’-bipyridinium bromide (Viologen 2)**

The product was prepared by the same procedure as Viologen 1(90%). Elemental Anal. Calcd. for C72H122N6O8Br2: C, 63.59; H, 9.06; N, 6.18. Found: C, 63.85; H, 9.22; N, 6.21.

**Table S1.** Gelation behavior of viologen 1 and 2 for organic solventsa

|  | **1** | **2** |
| --- | --- | --- |
| Methanol | P | P |
| Ethanol | P | P |
| 1-Propanol | P | P |
| Ethyl acetate | P | P |
| 1,4-Dioxane | P | P |
| Benzene | G | G |
| Chlorobenzene | G | G |
| Nitrobenzene | G | G |
| Toluene | G | G |
| CCl4 | Gp | Gp |
| DMF | S | S |
| DMSO | S | S |
| Chloroform | S | S |
| Acetonitrile | Gp | Gp |

a: 5 wt% solutions of viologens. G: Gelation, Gp: partial gel, P: Precipitation, S: Solution.


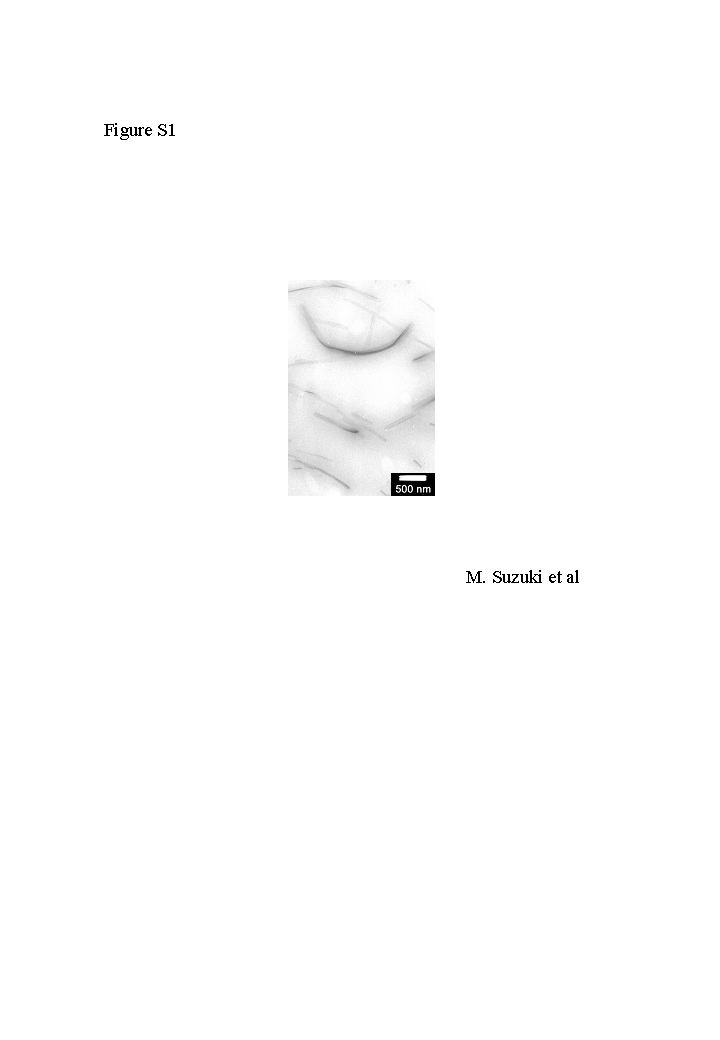


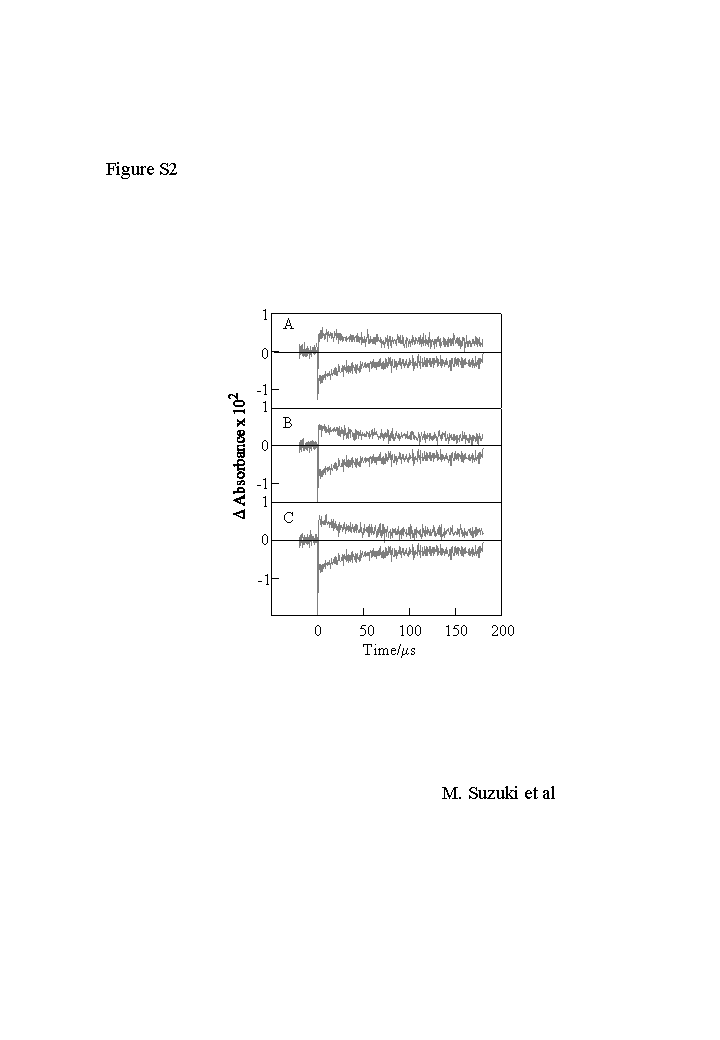

Supplement: b106513k.doc [file b106513k.doc]
